# Supplementary material for: Genetic Diversity and Pathogenic Features in Klebsiella pneumoniae Isolates from Patients with Pyogenic Liver Abscess and Pneumonia
Source: PubMed Central journal article supplement (PMC9045331; doi:10.1128/spectrum.02646-21), 2022-03-30

## Figure Legends

### **Figure S1 Heatmap of accessory genes in 232 *K. pneumoniae* isolates.**

Squares beside isolates represent the isolation sources and STs. Squares listed on the right represent clusters of orthologous groups (COG).

### **Figure S2 Heatmap of resistance genes in 232 *K. pneumoniae* isolates.**

Squares beside the isolates represent isolation sources and STs. Squares listed on the right represent antibiotic-related resistance genes.

### **Figure S3 Heatmap of plasmid replicons in 232 *K. pneumoniae* isolates.**

Squares beside the isolates represent isolation sources and STs. Squares listed on the right represent plasmid replicons.

### **Figure S4 Heatmap of virulence genes in 232 *K. pneumoniae* isolates.**

Squares beside the isolates represent isolation sources and STs. Squares listed on the right represent virulence genes.

Figure S1

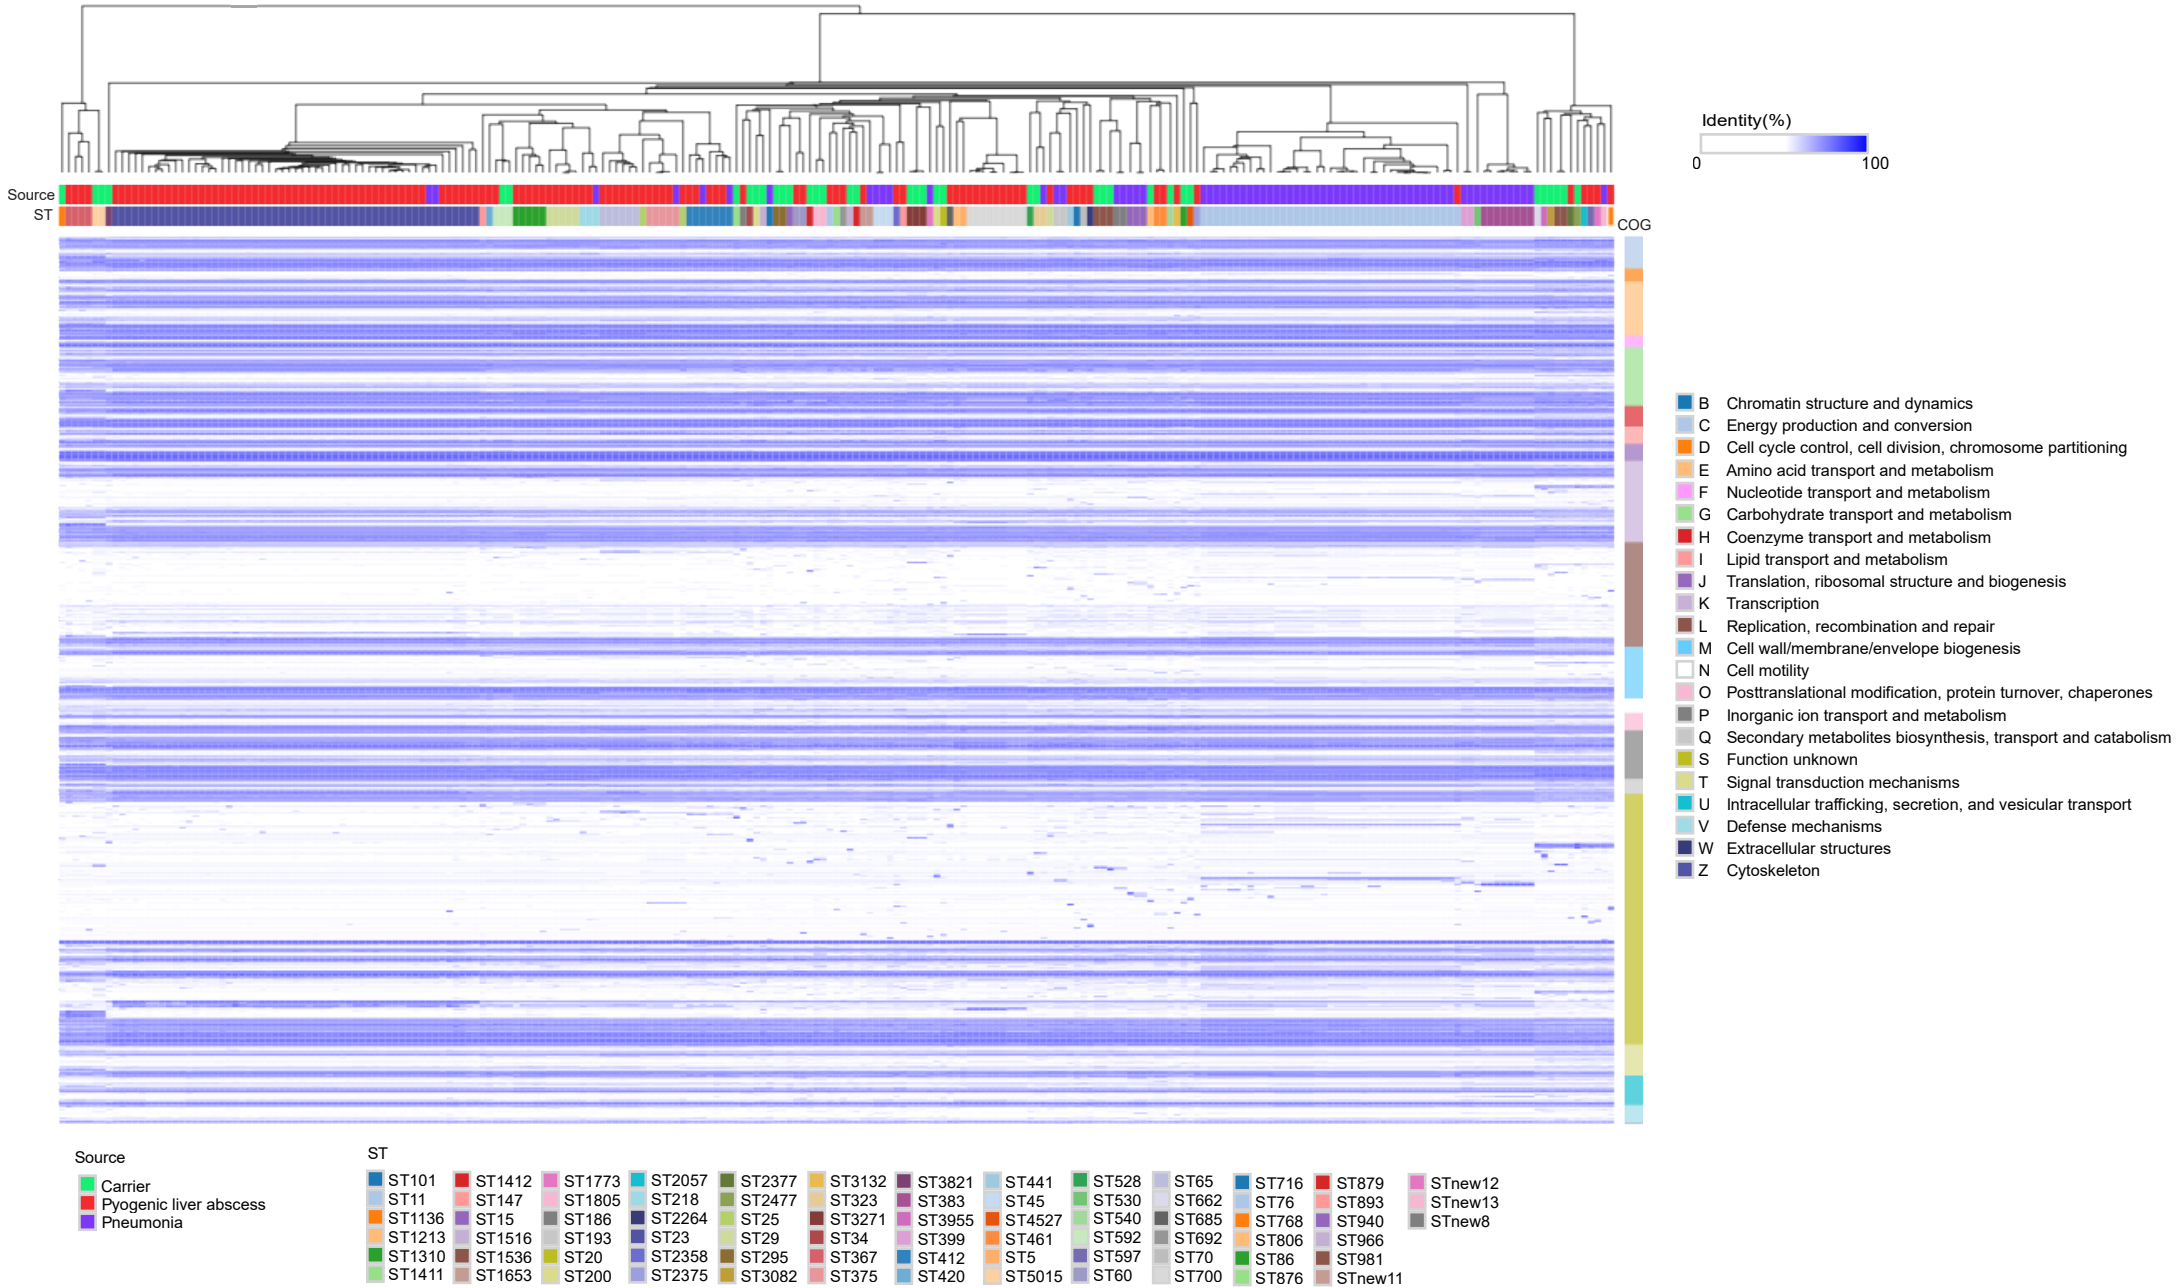

Figure S2

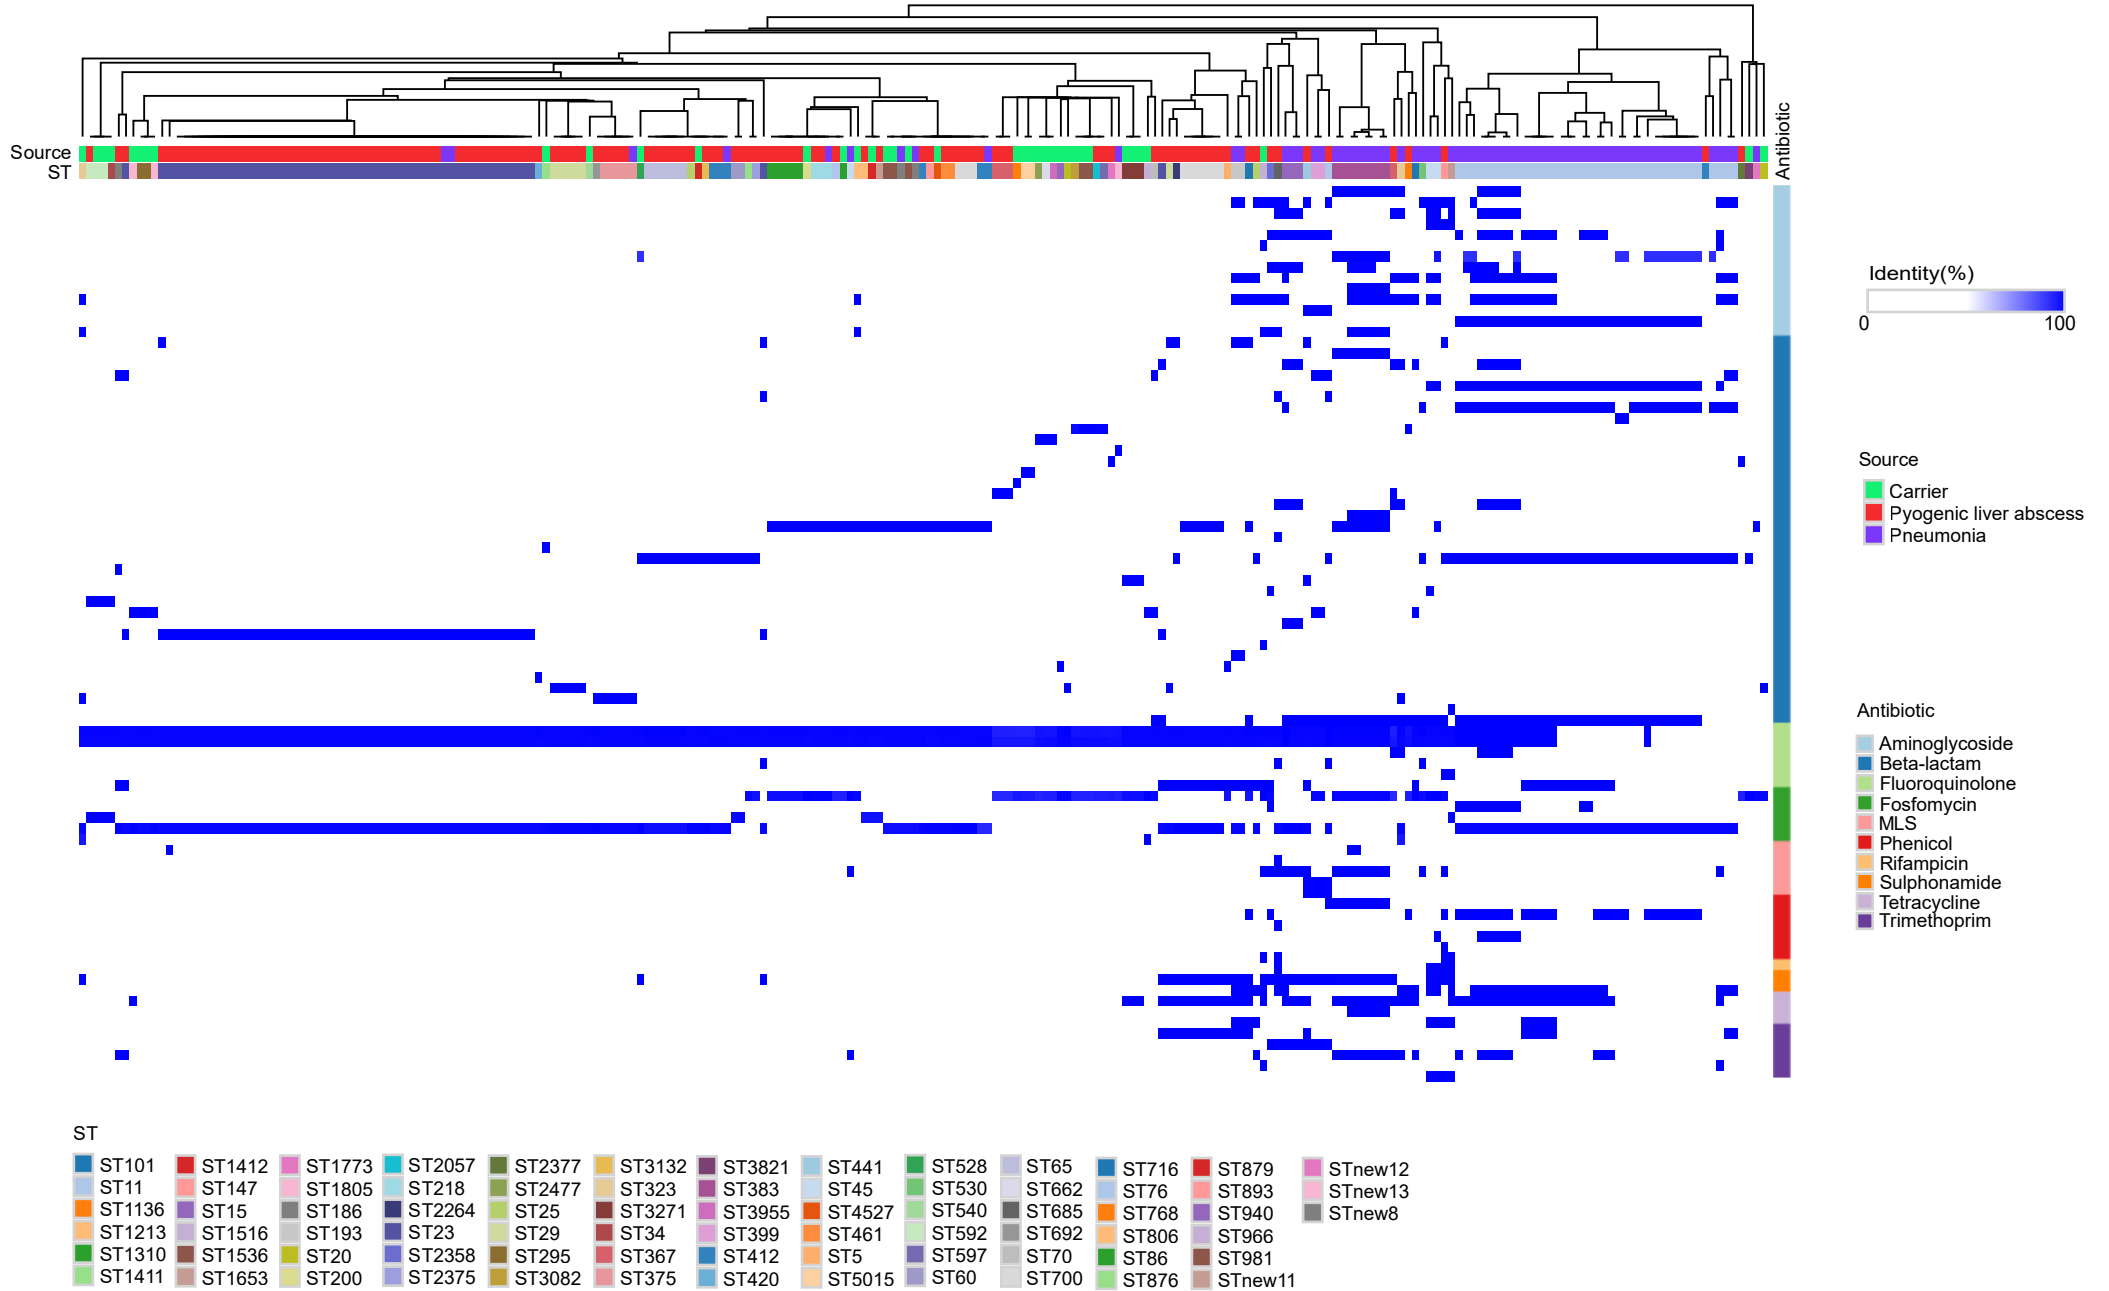

Figure S3

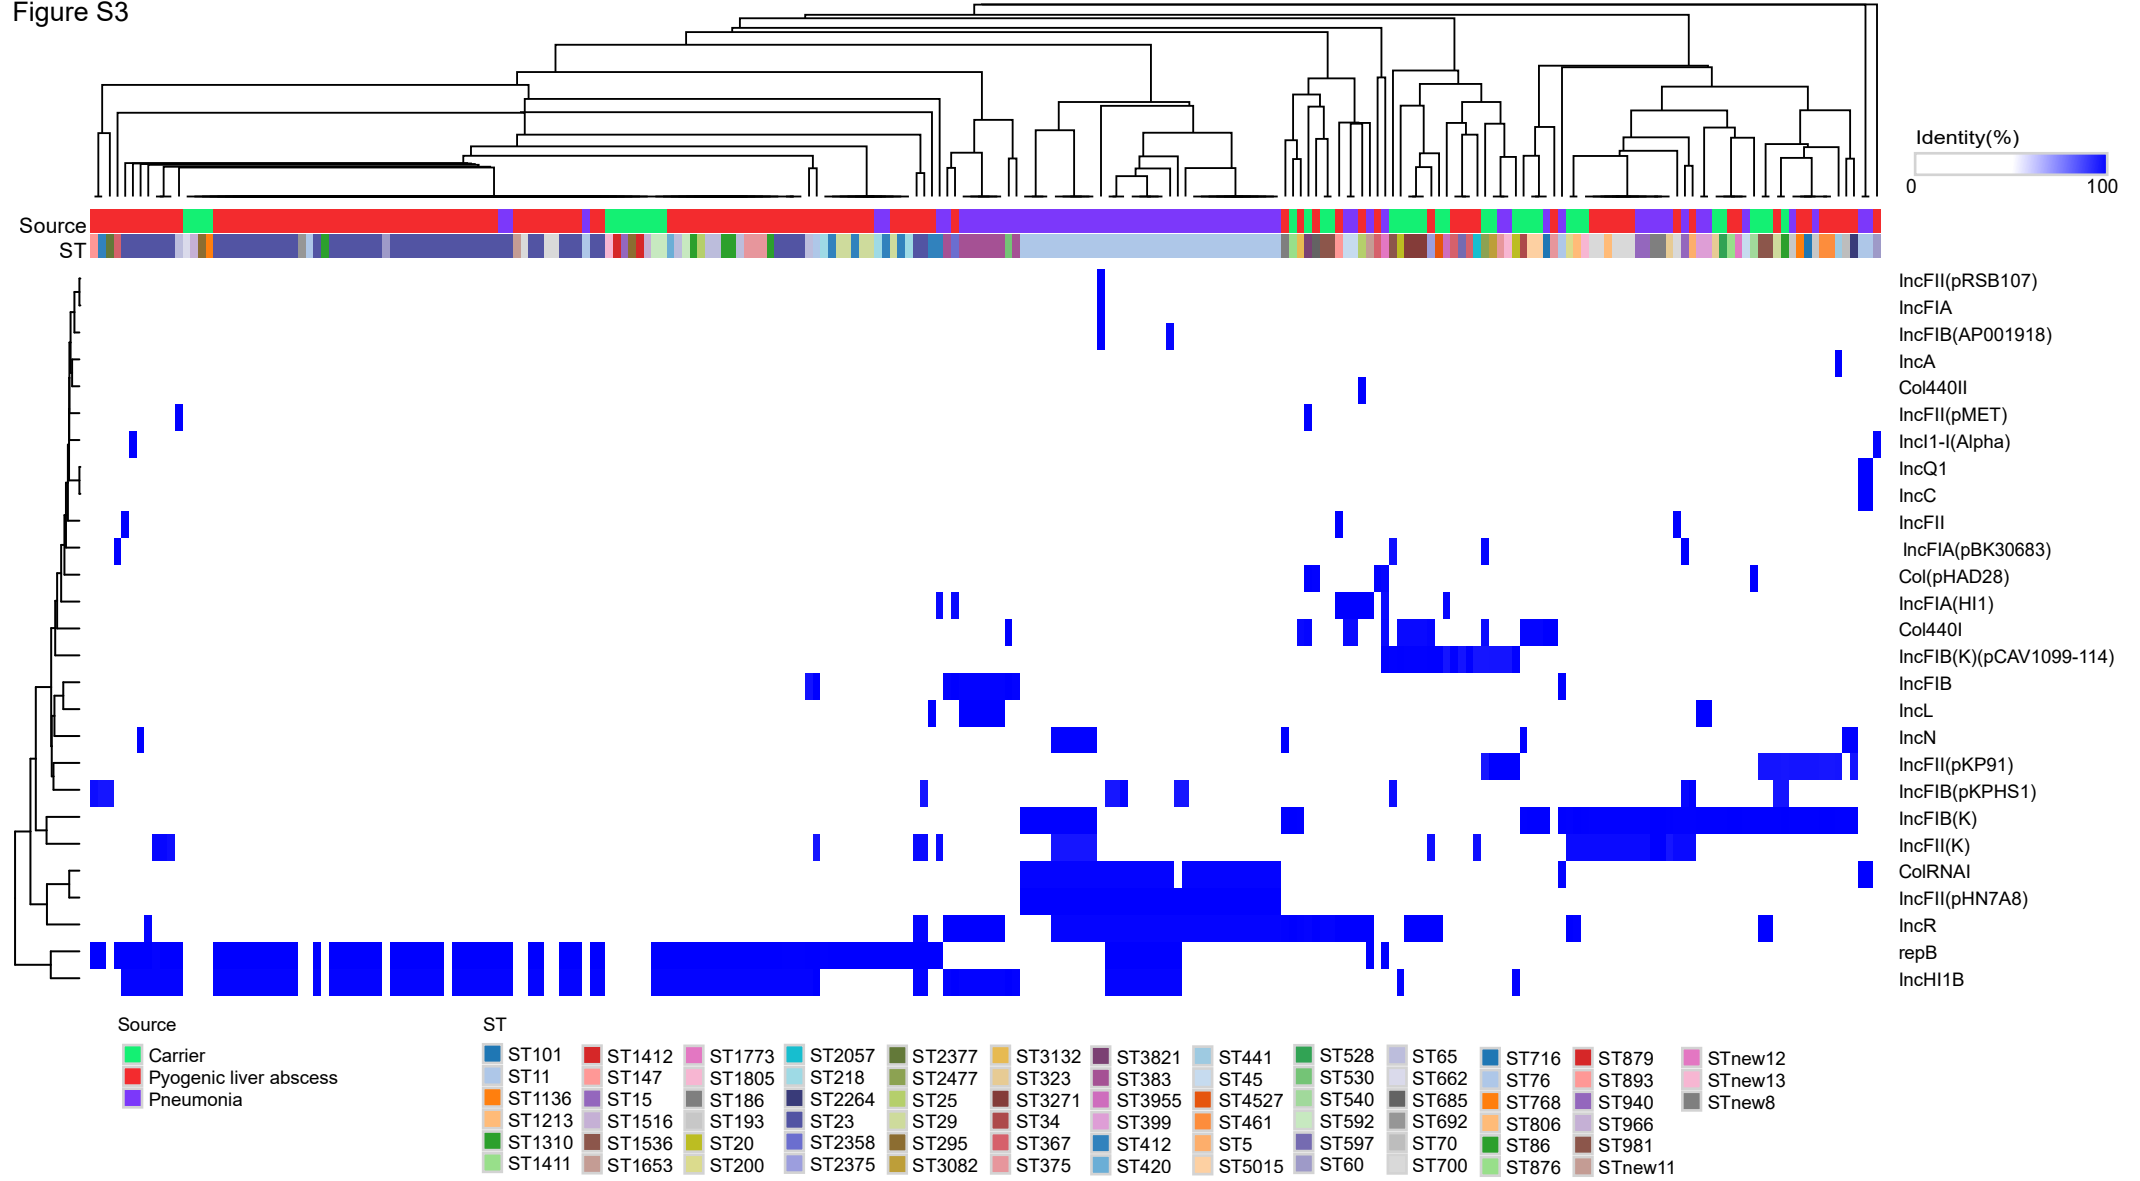

Figure S4

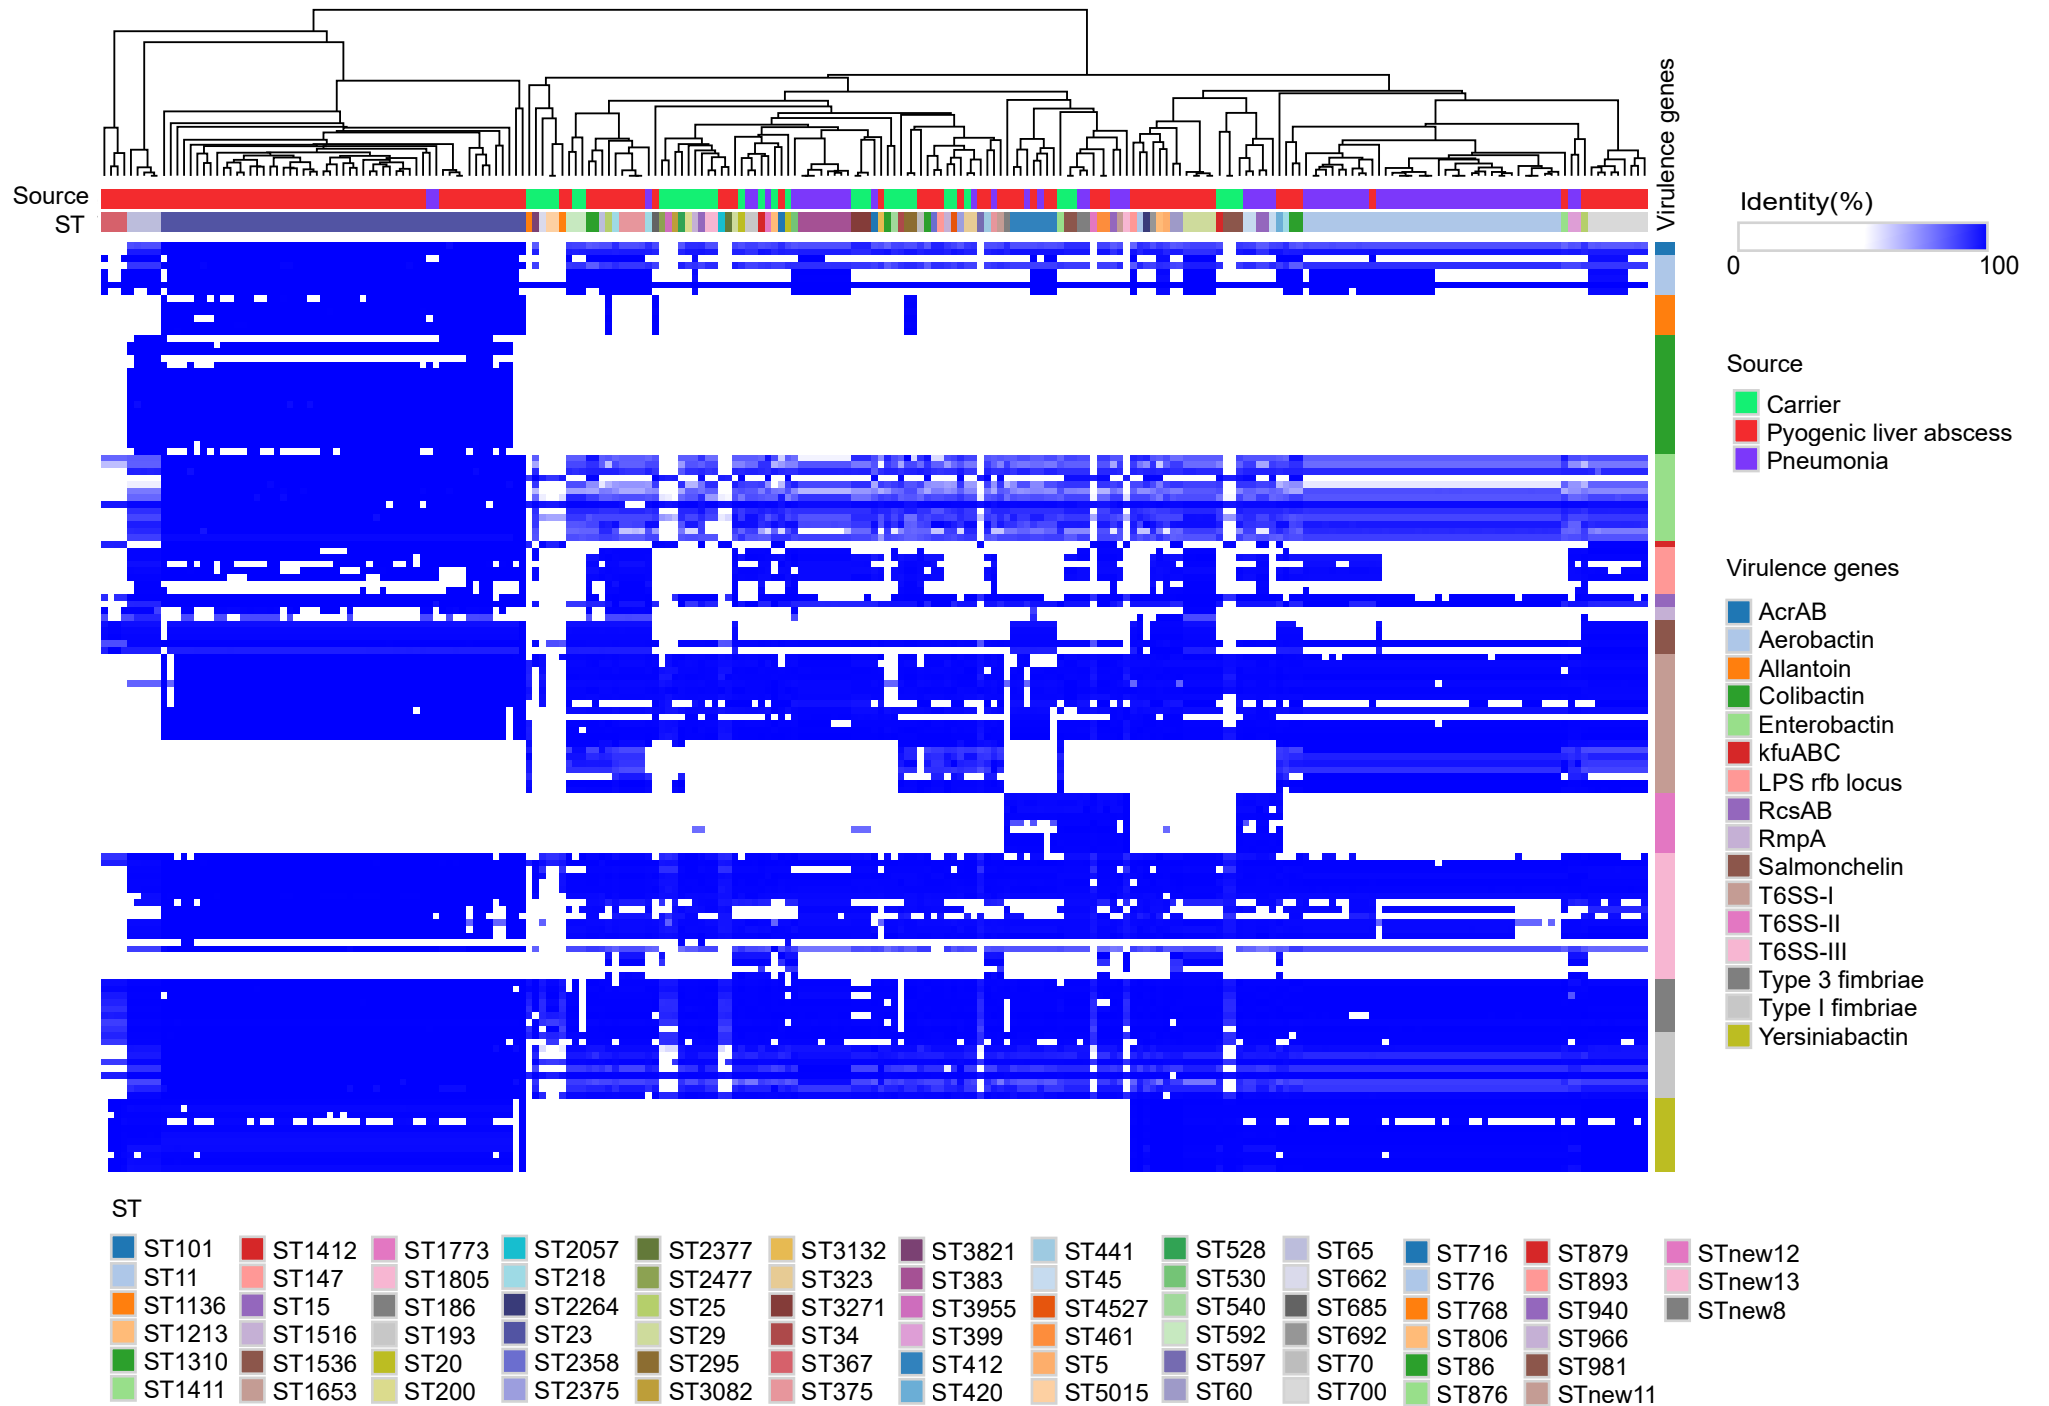

Supplement: spectrum02646-21_supp_1_seq6.pdf [file spectrum02646-21_supp_1_seq6.pdf]
